# Supplementary material for: A combined hypoxia and immune gene signature for predicting survival and risk stratification in triple-negative breast cancer
Source: publisher site journal article supplement (doi:10.18632/aging.203360), 2021-08-02
Supplement: Supplementary file [file aging-v13i15-203360-supplementary-material-SD2.pdf]

## SUPPLEMENTARY TABLE

Supplementary Table 1. The distribution of LASSO coefficients of the gene signature.

| <b>Gene</b> | <b>Coef</b> |
|-------------|-------------|
| IL2RG       | -0.04006    |
| CXCL13      | -0.10619    |
| LRSAM1      | 0.12198     |
| CXCL11      | -0.06781    |
| SERPINE1    | 0.023619    |
| TAPBPL      | -0.13158    |
